# Supplementary material for: A comparison of endoscopic and microscopic inlay butterfly cartilage tympanoplasties and their educational utility
Source: PubMed Central journal article supplement (PMC7598459; doi:10.1371/journal.pone.0241152), 2020-10-30
Supplement: pone.0241152.s003.pdf [file pone.0241152.s003.pdf]

**B) UNDERSTANDING OF IDENTIFICATION ON EXTERNAL/MIDDLE EAR ANATOMY AND SURGICAL STEPS IN BCIM**

| 1) IDENTIFICATION OF EXTERNAL/MIDDLE EAR ANATOMY                                                                   | Endoscopic approach understanding |         |       | Microscopic approach understanding |         |       |
|--------------------------------------------------------------------------------------------------------------------|-----------------------------------|---------|-------|------------------------------------|---------|-------|
|                                                                                                                    | No                                | Partial | Total | No                                 | Partial | Total |
| Have you identified the tympanic membrane and its related structures?                                              |                                   |         |       |                                    |         |       |
| Have you identified the tympanic annulus?                                                                          |                                   |         |       |                                    |         |       |
| Have you identified the handle of malleous?                                                                        |                                   |         |       |                                    |         |       |
| Have you identified middle ear structures including promontory, round window and tympanic segment of facial nerve? |                                   |         |       |                                    |         |       |
|                                                                                                                    |                                   |         |       |                                    |         |       |
| 2) UNDERSTANDING OF SURGICAL STEPS                                                                                 |                                   |         |       |                                    |         |       |
| Instillation of local anaesthesia at 6 and 12 o'clock of ear canal                                                 |                                   |         |       |                                    |         |       |
| Examination of perforation margin especially the anterior part                                                     |                                   |         |       |                                    |         |       |
| Refashioning of the perforation margin                                                                             |                                   |         |       |                                    |         |       |
| Insertion of butterfly cartilage tympanoplasty using inlay technique                                               |                                   |         |       |                                    |         |       |

**C) ENDOSCOPIC VS MICROSCOPIC APPROACH EDUCATIONAL SATISFACTION**

| NO | QUESTIONS                                                                                                             | Yes | No | Not sure/<br>do not know |
|----|-----------------------------------------------------------------------------------------------------------------------|-----|----|--------------------------|
| 1  | Did you identify the tympanic membrane and its related structures better in endoscopic approach?                      |     |    |                          |
| 2  | Did you identify the surgical steps and technique better in the endoscopic approach compared to microscopic approach? |     |    |                          |
| 3  | Do you think that the endoscope provides a better magnification and view of the entire surgical field?                |     |    |                          |
| 4  | Do you think that the endoscope is better than microscope for education purposes?                                     |     |    |                          |
| 5  | Do you think that endoscopic surgery is more difficult to perform than microscopic surgery?                           |     |    |                          |
| 6  | Do you think that the one-handed endoscopic approach is a disadvantage compared to microscopic approach?              |     |    |                          |
| 7  | Do you think that the choice of the surgical approach may influence the operative time?                               |     |    |                          |
| 8  | Do you think that the learning curve of endoscopic surgery is longer and more difficult than microscopic surgery?     |     |    |                          |
| 9  | Considering the advantages and disadvantages of endoscopy would you choose this surgical approach in your training?   |     |    |                          |

**SCORE :**

Section B1: Total : 2, Partial : 1, No : 0  
Marks (0 – 8)

Section B2 : Total : 2, Partial : 1, No : 0  
Marks (0 – 8)
